# Supplementary material for: The lysosomal Ragulator complex plays an essential role in leukocyte trafficking by activating myosin II
Source: PubMed Central journal article supplement (PMC8184920; doi:10.1038/s41467-021-23654-3), 2021-06-07
Supplement: 41467_2021_23654_MOESM1_ESM.pdf [file 41467_2021_23654_MOESM1_ESM.pdf]

## Supplementary Informations

# **The lysosomal Ragulator complex plays an essential role in leukocyte trafficking by activating myosin II**

Takeshi Nakatani, Kohei Tsujimoto, JeongHoon Park,  
Tatsunori Jo, Tetsuya Kimura, Yoshitomo Hayama, Hachiro Konaka,  
Takayoshi Morita, Yasuhiro Kato, Masayuki Nishide,  
Shyohei Koyama, Shigeyuki Nada, Masato Okada,  
Hyota Takamatsu, and Atsushi Kumanogoh

**a**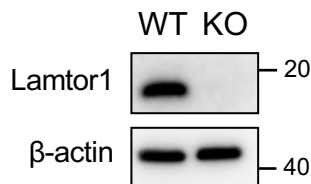**b**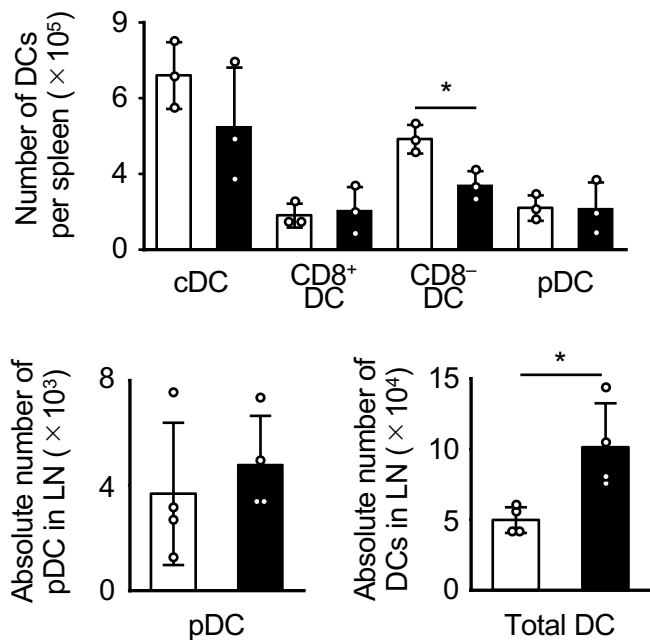

**Supplementary Figure 1. Generation of DC-specific *Lamtor1*-knockout mice, and characterization of the immune cell population in *CD11c-Lamtor1*<sup>-/-</sup> mice.**

**a)** *Lamtor1* was not expressed in DCs isolated from *CD11c-Lamtor1*<sup>-/-</sup> mice. *Lamtor1* protein levels in WT and *Lamtor1*<sup>-/-</sup> DCs are shown. Data are representative of three experiments.

**b)** Absolute number of the DC-subset in spleen and LNs. A single-cell suspension isolated from spleen (n=3) (upper) and inguinal LNs (n=4) (lower) of WT (white bar) and *CD11c-Lamtor1*<sup>-/-</sup> (black bar) mice were treated with collagenase, stained, and evaluated by flow cytometry. Conventional DCs (cDCs), CD11c<sup>+</sup> I-A/I-E<sup>+</sup>; CD8<sup>+</sup>DC, CD11c<sup>+</sup> I-A/I-E<sup>+</sup> CD8<sup>+</sup>; CD8-DC, CD11c<sup>high</sup> I-A/I-E<sup>+</sup> CD8<sup>-</sup>; pDC, CD11c<sup>int</sup> PDCA-1<sup>+</sup>. Statistical analyses were performed by two-sided Student's t-test (**b**) [means  $\pm$  s.d.; \**p*<0.05].

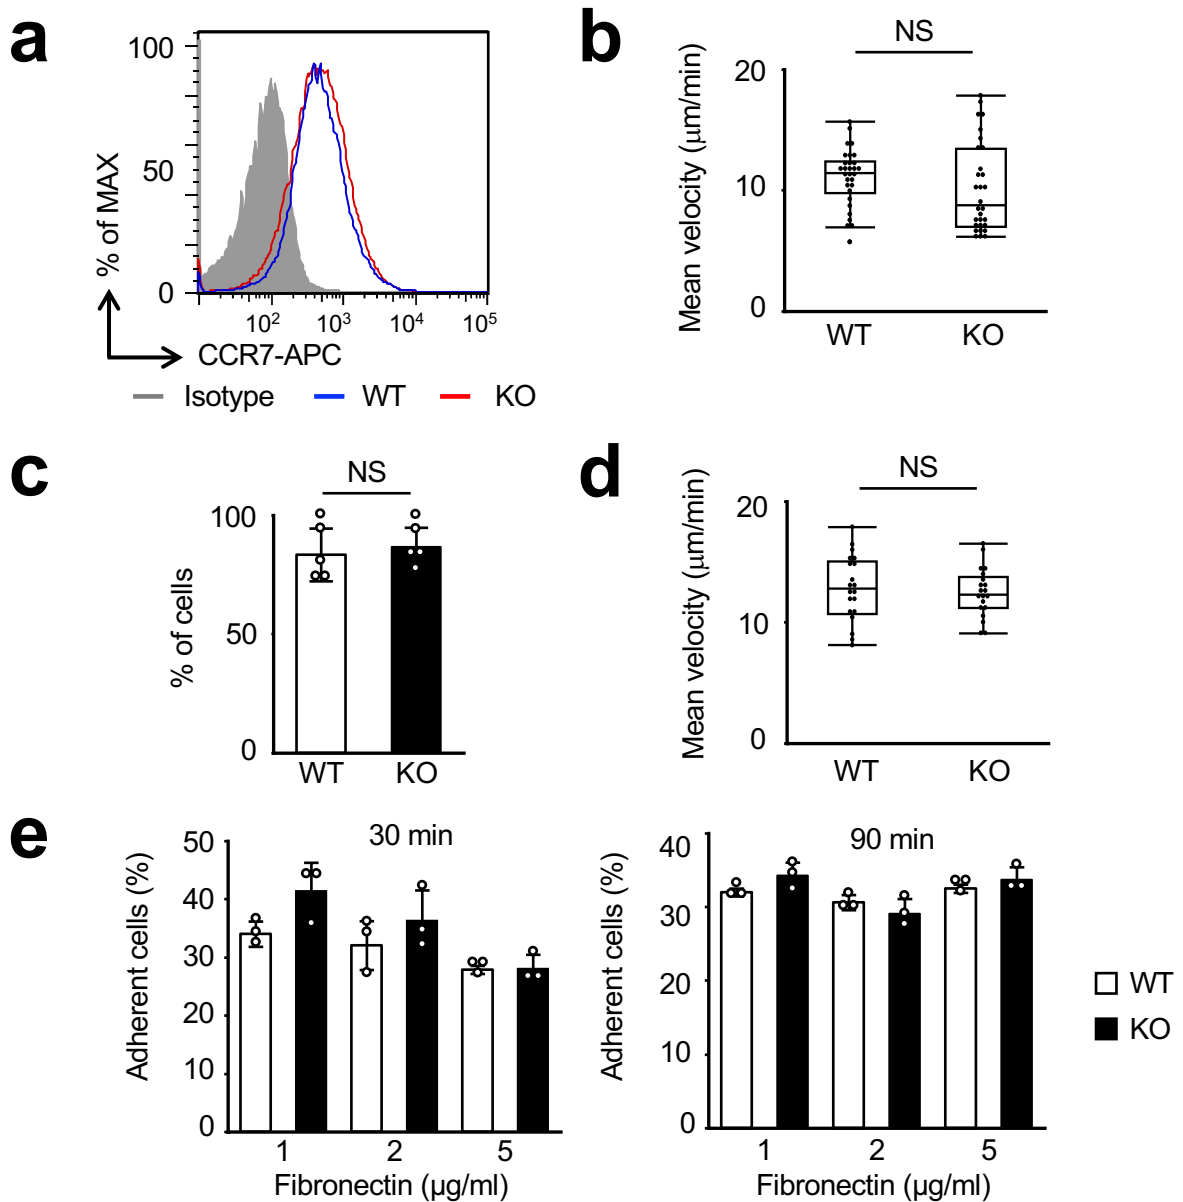

**Supplementary Figure 2. DC migration in a 2D environment and adhesion of WT and *Lamtor1*<sup>-/-</sup> BMDCs.**

**a)** Level of CCR7 in WT (blue line) and *Lamtor1*<sup>-/-</sup> (red line) BMDCs. Data are representative of three experiments.

**b)** Velocities of randomly moving WT and *Lamtor1*<sup>-/-</sup> BMDCs. Movement of DCs on coverslips coated with 10 μg/ml fibronectin was observed by time-lapse video imaging. Mean velocity of single DCs during the observation period was calculated (n=30).

**c, d)** Directional migration of WT (white bar) and *Lamtor1*<sup>-/-</sup> (black bar) BMDCs in response to CCL19. Horizontal migration of BMDCs in response to CCL19 (5 μg/ml) was visualized using an EZ-TAXIScan device (slit size, 5 μm). **c)** Directionality was assessed as DC position relative to its original position, and is presented as the percentage of cells that ended within a 30° arc facing the CCL19 source **(e)**. Mean velocity of each individual migrating DC during the observation period (n=20) **(d)**.

**e)** Adhesion of WT and *Lamtor1*<sup>-/-</sup> BMDCs to fibronectin-coated dishes. Calcein-labeled WT (white bar) and *Lamtor1*<sup>-/-</sup> BMDCs (black bar) were applied on the fibronectin (1, 2, or 5 μg/ml)-coated dishes for 30 or 90 min. After tight washing, cells were lysed, and fluorescence intensity was measured. Data are representative of three experiments.

Statistical analyses were performed by Student's t-test **(c, e)** [means ± s.d.; NS, not statistically significant] or two-sided Mann-Whitney U test **(b, d)** [median; 25<sup>th</sup> and 75<sup>th</sup> percentiles; and minimum and maximum of a population excluded outliers; NS, not statistically significant].

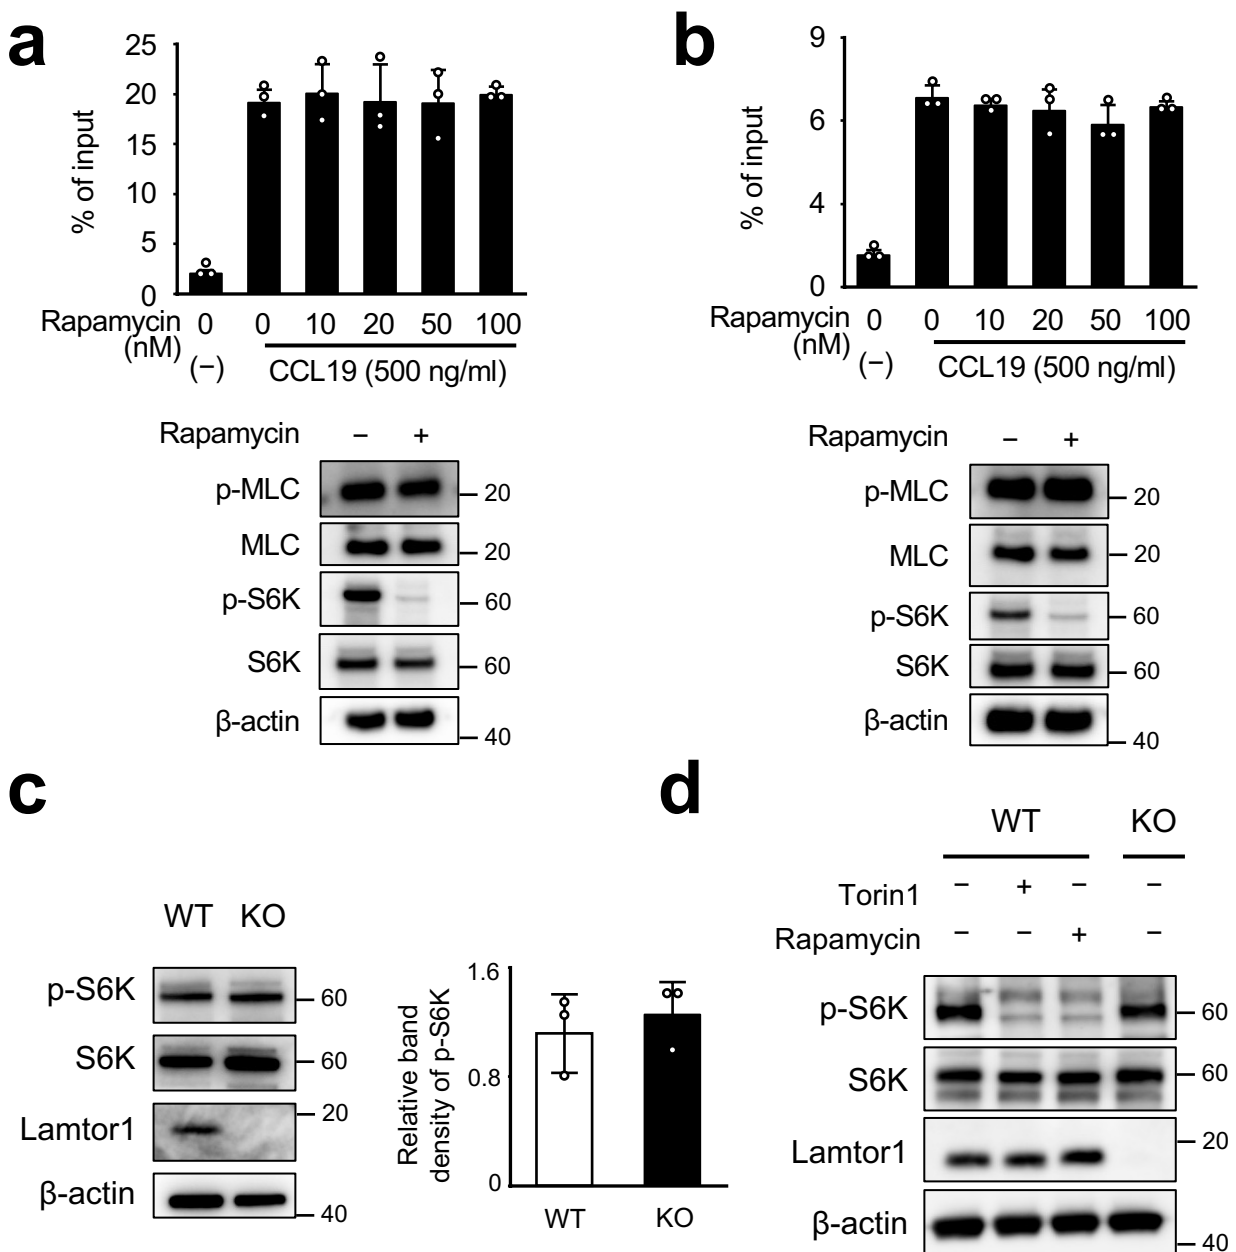

### Supplementary Figure 3. S6K phosphorylation was not reduced in *Lamtor1*<sup>-/-</sup> DCs.

**a, b**) The effect of rapamycin on DC-chemotaxis in medium containing different concentrations of amino acids. Chemotaxis of WT BMDCs in response to 500 ng/ml CCL19 in the presence of different concentrations of rapamycin in DMEM medium containing high concentrations of amino acids (**a**) or RPMI-free medium containing no amino acids (**b**) was evaluated by Transwell (pore size, 5  $\mu$ m) (n=3) (upper). Phosphorylation of MLC and S6K treatment with rapamycin was determined by western blotting (lower). Data are representative of three experiments.

**c, d**) S6K phosphorylation of WT and *Lamtor1*<sup>-/-</sup> splenic DCs (**c, left**) and BMDCs (**d**) were determined by western blotting. Data are representative of three experiments. Quantification of p-S6K bands relative to S6K (**c, right**) (n=3). Statistical analysis was performed by Student's t-test (**a-c**) [means  $\pm$  s.d.]

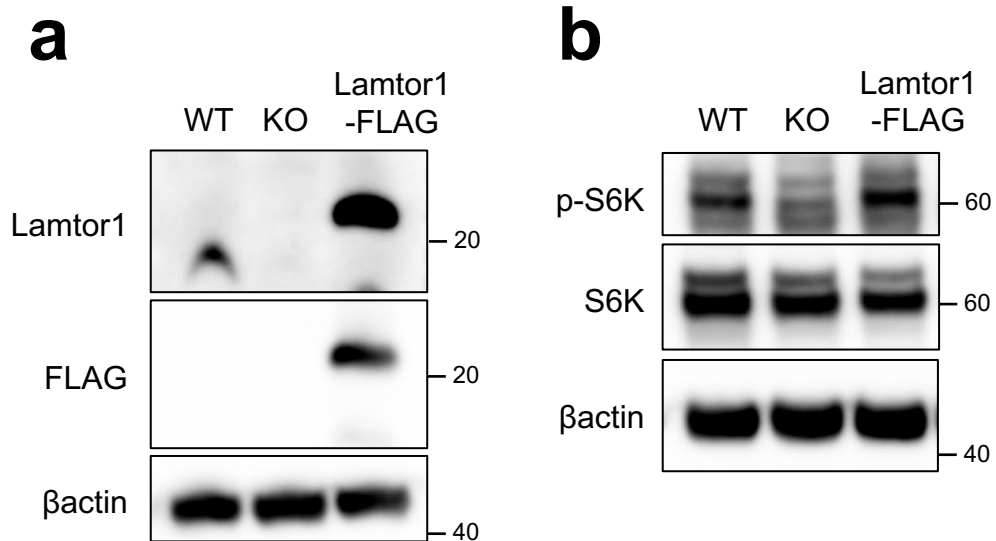

#### Supplementary Figure 4. Establishment of Lamtor1-KO-THP1 and Lamtor1-KO-Full-THP1

**a, b)** Generation of Lamtor1-KO-THP1 using the CRISPR/Cas9 system and re-expression of FLAG-tagged full-length Lamtor1 in Lamtor1-KO-THP1 by lentiviral transduction. Expression of Lamtor1 in parental THP1 (WT), Lamtor1-KO-THP1 (KO), and Lamtor1-KO-Full-THP1 was evaluated using anti-Lamtor1 and anti-FLAG antibodies (**a**). Phosphorylation of S6K in these cells was evaluated by western blotting using anti-phospho-S6K and anti-S6K antibodies (**b**). Data are representative of three experiments.

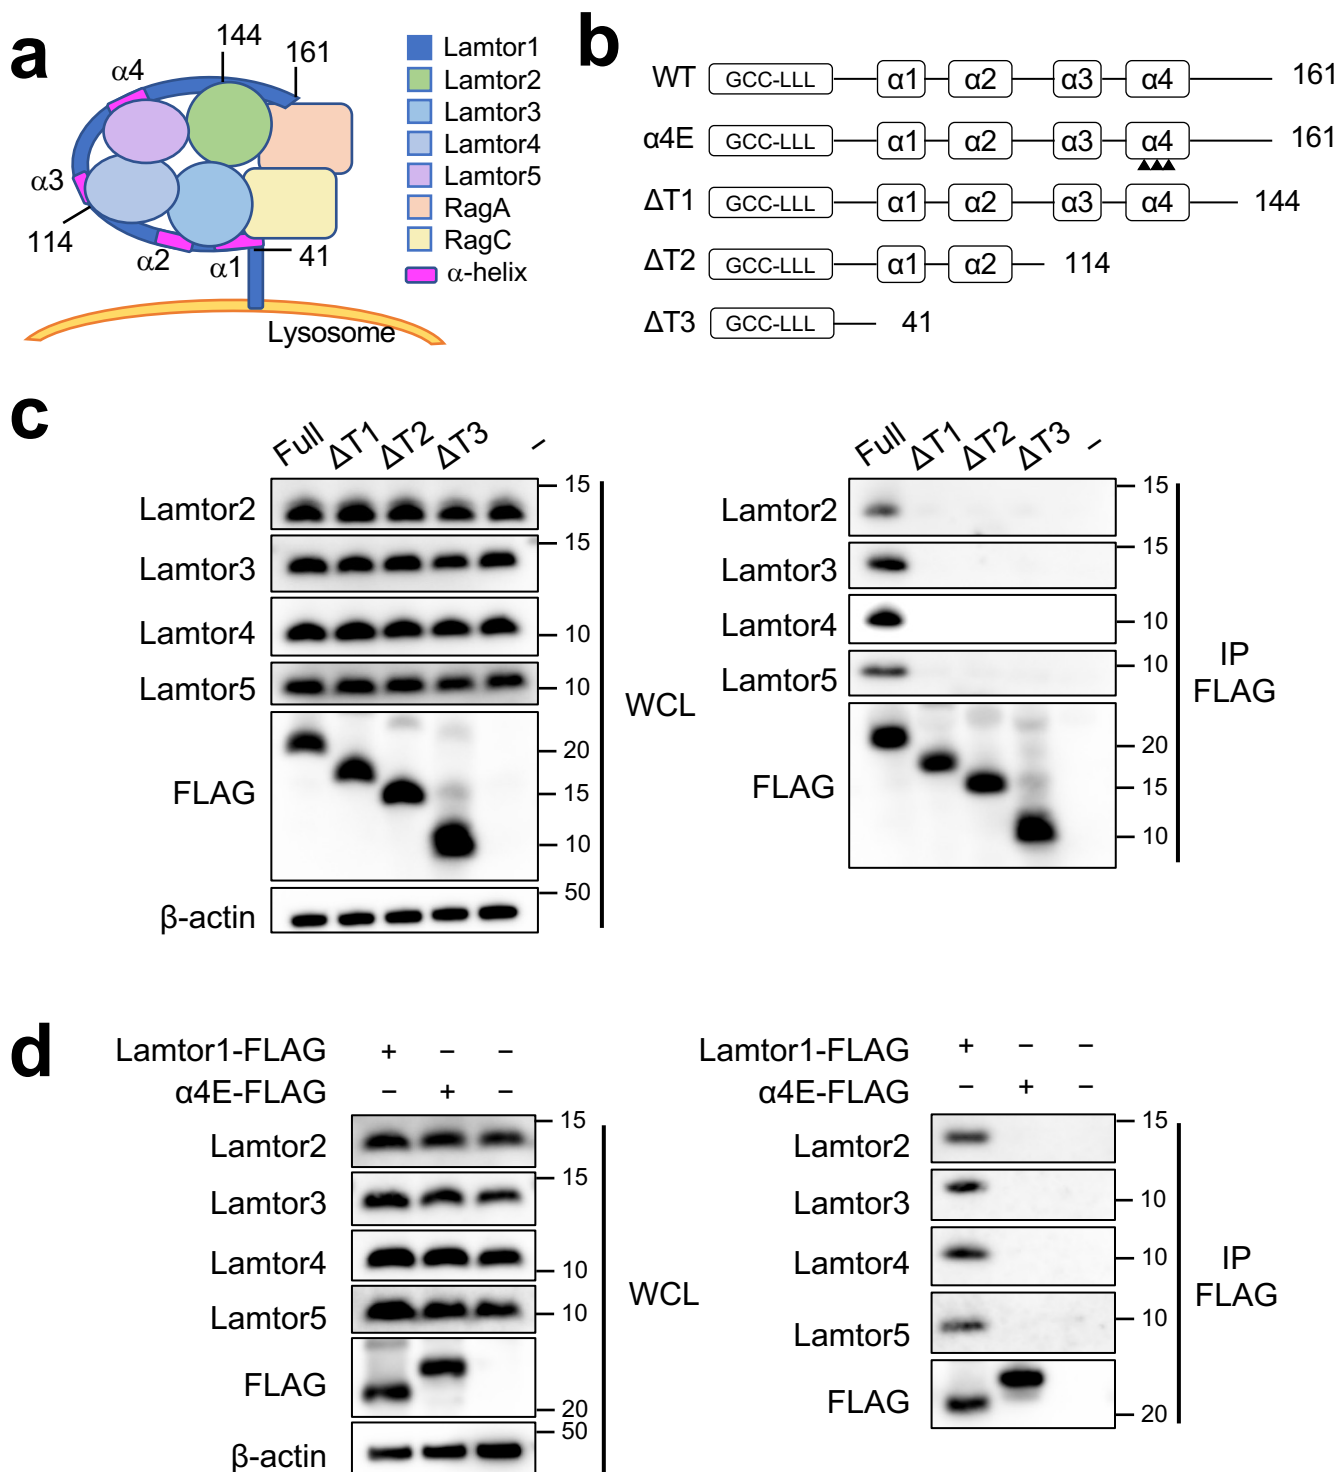

**Supplementary Figure 5. Intact Lamtor1 is necessary for formation of the Ragulator complex.**

**a)** Schematic of the Ragulator complex.

**b)** Schematic of mutant Lamtor1 ( $\alpha$ 4E,  $\Delta$ T1,  $\Delta$ T2, and  $\Delta$ T3). Full length Lamtor1 is Met1–Pro161. Arrowheads indicate the position of amino acid substitutions (Leu129Glu, Ile135Glu, and Leu143Glu in the  $\alpha$ 4 helix).  $\Delta$ T1 is Met1–Ser144,  $\Delta$ T2 is Met1–Gln114, and  $\Delta$ T3 is Met1–His41.

**c, d)** A mutant of Lamtor1 did not bind to Lamtor2–5. HEK293T cells transfected with FLAG-tagged full-length Lamtor1, FLAG-tagged truncated Lamtor1 ( $\Delta$ T1,  $\Delta$ T2,  $\Delta$ T3) (**c**), or the FLAG-tagged substitution form of Lamtor1 ( $\alpha$ 4E) (**d**), was lysed and immunoprecipitated with anti-FLAG antibodies. Lamtor2–5 in whole-cell lysate (left) and precipitates (right) were detected by western blotting using antibodies against Lamtor2–5. Data are representative of three experiments.

**a**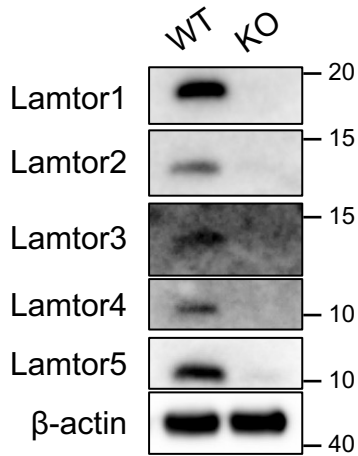**b**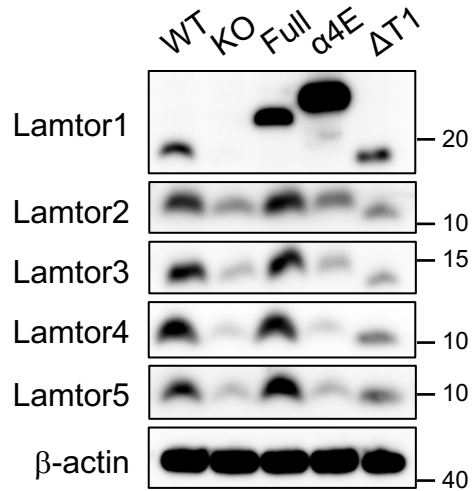

**Supplementary Figure 6. Ragulator complex formation is defective in cells lacking Lamtor1 or expressing mutant Lamtor1.**

**a)** Expression of Lamtor1–5 in WT and *Lamtor1*<sup>-/-</sup> BMDCs. Whole-cell lysates were prepared from WT and *Lamtor1*<sup>-/-</sup> BMDCs, and Lamtor1–5 were detected by western blotting. Data are representative of three experiments.

**b)** Expression of Lamtor1–5 in parental THP1 (WT), Lamtor1-KO-THP1 (KO), Lamtor1-KO-Full-THP1 (Full), Lamtor1-KO- $\alpha$ 4E-THP1 ( $\alpha$ 4E), and Lamtor1-KO- $\Delta$ T1-THP1 ( $\Delta$ T1). Whole-cell lysates were obtained from these cells, and Lamtor1–5 were detected by western blotting. Data are representative of three experiments.

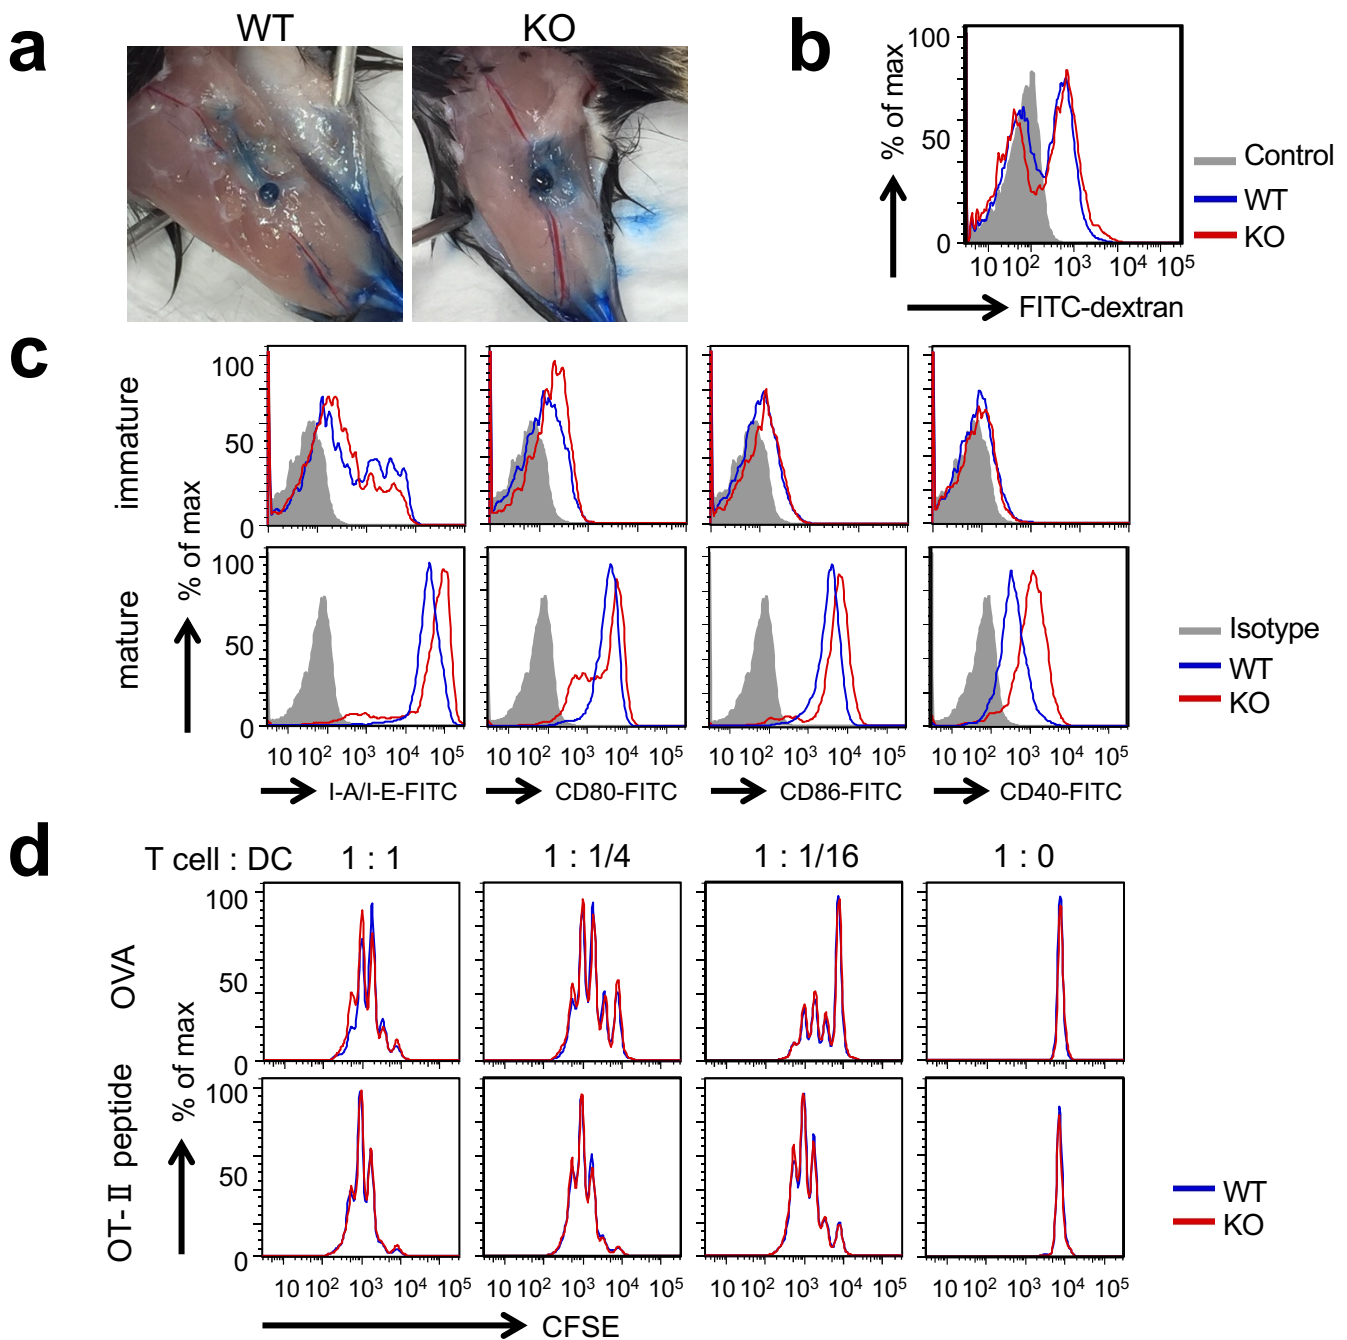

### Supplementary Figure 7. Characteristics of *Lamtor1*<sup>-/-</sup> DCs

**a)** Staining of afferent lymphatics and popliteal LNs. One hour after injection of Evans blue dye (5 mg/ml) into the footpad of WT (upper) and CD11c-*Lamtor1*<sup>-/-</sup> (lower) mice, afferent lymphatics and popliteal LNs were observed.

**b)** FITC-dextran uptake of DCs. WT (blue line) and *Lamtor1*<sup>-/-</sup> BMDCs (red line) were incubated with FITC-dextran at 37 °C for 30 min. Control cells (gray) were cultured on ice with FITC-dextran.

**c)** Expression of co-stimulatory molecules in WT and *Lamtor1*<sup>-/-</sup> DCs. WT (blue line) or *Lamtor1*<sup>-/-</sup> DCs (red line) were stimulated with or without LPS (200 ng/ml) for 18 h, and the levels of co-stimulatory molecules (I-A/I-E, CD80, CD86, CD40) were assessed by FACS.

**d)** *In vitro* OT-II T-cell proliferation by OVA- or OT-II peptide-pulsed WT and *Lamtor1*<sup>-/-</sup> DCs. CFSE-labeled CD4<sup>+</sup> OT-II T cells were cultured with WT (blue line) or *Lamtor1*<sup>-/-</sup> BMDCs (red line) in the presence of OVA protein (upper) or OT-II peptide (lower). CFSE dilution was assessed by FACS.

Data are representative of three experiments.



## Supplemental Tables

| Identified Proteins                                 | Accession Number   | Molecular Weight | total spectrum count WT | total spectrum count KO |
|-----------------------------------------------------|--------------------|------------------|-------------------------|-------------------------|
| Supervillin                                         | E9Q3Z5             | 230 kDa          | 6.1419                  | 0                       |
| Putative uncharacterized protein                    | Q3ULB1 (+1)        | 47 kDa           | 6.1419                  | 0                       |
| LIM domain and actin-binding protein 1              | Q9ERG0             | 84 kDa           | 6.1419                  | 0                       |
| T-complex protein 1 subunit beta                    | P80314             | 57 kDa           | 4.0946                  | 0                       |
| Phostensin                                          | Q8BQ30             | 66 kDa           | 4.0946                  | 0                       |
| Cytochrome b-c1 complex subunit 2, mitochondrial    | Q9DB77             | 48 kDa           | 4.0946                  | 0                       |
| Ragulator complex protein LAMTOR2                   | Q9JHS3             | 13 kDa           | 4.0946                  | 0                       |
| TAR DNA-binding protein 43                          | A0A087WRZ5 (+5)    | 32 kDa           | 3.071                   | 0                       |
| Serine/threonine-protein phosphatase                | A0A0G2JGC1 (+2)    | 31 kDa           | 3.071                   | 0                       |
| CAD protein                                         | B2RQC6 (+2)        | 243 kDa          | 3.071                   | 0                       |
| Coronin-1A                                          | O89053             | 51 kDa           | 3.071                   | 0                       |
| Annexin A2                                          | P07356             | 39 kDa           | 3.071                   | 0                       |
| Dynactin subunit 4                                  | Q8CBY8             | 53 kDa           | 3.071                   | 0                       |
| Chloride intracellular channel protein 1            | Q9Z1Q5             | 27 kDa           | 3.071                   | 0                       |
| Ubiquitin-like modifier-activating enzyme ATG7      | A0A0A0MQN4 (+3)    | 82 kDa           | 2.0473                  | 0                       |
| Voltage-gated potassium channel subunit beta-2      | E0CXZ9 (+2)        | 43 kDa           | 2.0473                  | 0                       |
| Proteasome activator complex subunit 2              | E0CZ90 (+2)        | 19 kDa           | 2.0473                  | 0                       |
| Puromycin-sensitive aminopeptidase                  | F6QYF8 (+1)        | 99 kDa           | 2.0473                  | 0                       |
| <b>Myosin phosphatase Rho-interacting protein</b>   | <b>F6RND9 (+3)</b> | <b>114 kDa</b>   | <b>2.0473</b>           | <b>0</b>                |
| Voltage-dependent anion-selective channel protein 2 | G3UX26 (+1)        | 30 kDa           | 2.0473                  | 0                       |
| Heterogeneous nuclear ribonucleoprotein U           | G3XA10 (+1)        | 87 kDa           | 2.0473                  | 0                       |
| Pro-interleukin-16                                  | O54824             | 141 kDa          | 2.0473                  | 0                       |
| Ras-related protein Rab-7a                          | P51150             | 23 kDa           | 2.0473                  | 0                       |
| 40S ribosomal protein S11                           | P62281             | 18 kDa           | 2.0473                  | 0                       |
| 40S ribosomal protein S13                           | P62301 (+1)        | 17 kDa           | 2.0473                  | 0                       |
| Sorting and assembly machinery component 50 homolog | Q8BGH2             | 52 kDa           | 2.0473                  | 0                       |
| Phosphatidylinositol 4-kinase alpha                 | A0A140T8I9 (+1)    | 231 kDa          | 2.0473                  | 0                       |
| 60S ribosomal protein L37a                          | P61514             | 10 kDa           | 2.0473                  | 0                       |
| Nuclear pore complex protein Nup160                 | Q9Z0W3             | 158 kDa          | 2.0473                  | 0                       |
| Heat shock protein 75 kDa, mitochondrial            | Q9CQN1             | 80 kDa           | 2.0473                  | 0                       |
| Histone H2A                                         | A0A0N4SV66 (+10)   | 14 kDa           | 2.0473                  | 0                       |
| Glutamate-cysteine ligase regulatory subunit        | A0A0G2JDI4 (+1)    | 11 kDa           | 2.0473                  | 0                       |
| Elongation factor 1-beta                            | G3UX43 (+2)        | 8 kDa            | 2.0473                  | 0                       |
| 40S ribosomal protein S23                           | P62267             | 16 kDa           | 2.0473                  | 0                       |
| Glycine--tRNA ligase                                | Q9CZD3             | 82 kDa           | 2.0473                  | 0                       |
| Protein S100-A6                                     | P14069             | 10 kDa           | 2.0473                  | 0                       |
| Protein Rpl23a-ps3                                  | A0A140T8M7 (+1)    | 18 kDa           | 2.0473                  | 0                       |

### Supplementary Table 1. Candidate Lamtor1-interacting proteins, as determined by mass spectrometry analysis.

WT and *Lamtor1*<sup>-/-</sup> DCs were lysed and immunoprecipitated using anti-Lamtor1 antibody. After elution of lysates, LC-MS/MS was performed. Validation of MS/MS-based peptide and protein identification was performed using the Scaffold software (ver. 4.4.3). Among 584 proteins that were identified, proteins with a total spectrum count of 0 in the knockout and a total spectrum count above 2 in WT were selected.

| <b>Reagents</b>                 |  |                 |                |
|---------------------------------|--|-----------------|----------------|
| Name                            |  | Vender          | Catalog number |
| LPS                             |  | Sigma           |                |
| PMA                             |  | Sigma           |                |
| FITC-isomer I                   |  | Sigma           |                |
| Rapamycin                       |  | Sigma           |                |
| fibronectin                     |  | Sigma           |                |
| collagenase D                   |  | Roche           |                |
| type I collagen                 |  | BD Biosciences  |                |
| Calcein-AM                      |  | Invitrogen      |                |
| CFSE                            |  | Invitrogen      |                |
| phalloidin-546                  |  | Invitrogen      |                |
| AcidiFluor-ORANGE               |  | GORYO Chemistry | GC301          |
| Torin1                          |  | Sellec          | S2827          |
| U0126                           |  | Calbiochem      | 662009         |
| (-)-Blebbistatin                |  | Cayman Chemical | 13013          |
| recombinant mouse CCL19         |  | R & D systems   |                |
| recombinant mouse CCL21         |  | R & D systems   |                |
| recombinant human MCP-1         |  | R & D systems   |                |
| mouse GM-CSF                    |  | Wako            |                |
| Evans blue                      |  | Nacalai tesque  |                |
| MISSION shRNA plasmid for MPRIP |  | Sigma           | TRCN0000048648 |

| <b>Antibodies for immunohistochemistry</b>    |       |                           |                |
|-----------------------------------------------|-------|---------------------------|----------------|
| Name                                          | Clone | Vender                    | Catalog number |
| Phospho-Myosin Light Chain 2 (Ser19) Antibody |       | Cell Signaling Technology | #3671          |
| Anti-MPRIP antibody                           |       | Sigma                     | HPA022901      |
| Anti-LAMP1 antibody                           | 1D4B  | Abcam                     | ab25245        |
| Anti-MYPT1 antibody                           |       | Santa Cruz                | sc-514261      |
| Alexa Fluor® 647 anti-mouse CD11c Antibody    | N418  | Biolegend                 | 117312         |
| anti-PECAM-1 antibody                         |       | Abcam                     | ab28364        |
| Monoclonal ANTI-FLAG® M2 (mouse)              | M2    | Sigma                     | F3165          |

| <b>Antibodies for flow cytometry</b>              |             |            |                |
|---------------------------------------------------|-------------|------------|----------------|
| Name                                              | Clone       | Vender     | Catalog number |
| APC anti-mouse CD11c antibody                     | N418        | Biolegend  | 117310         |
| APC anti-mouse I-A/I-E Antibody                   | M5/114.15.2 | Biolegend  | 107614         |
| FITC anti-mouse I-A/I-E Antibody                  | M5/114.15.2 | Biolegend  | 107605         |
| Brilliant Violet 421™ anti-mouse I-A/I-E Antibody | M5/114.15.2 | Biolegend  | 107632         |
| APC anti-mouse CD197 (CCR7) Antibody              | 4B-12       | Biolegend  | 120108         |
| APC anti-mouse/human CD45R/B220 Antibody          | RA3-6B2     | Biolegend  | 103212         |
| APC anti-mouse CD3ε Antibody                      | 145-2C11    | Biolegend  | 100312         |
| FITC anti-mouse CD8a Antibody                     | 53-6.7      | Biolegend  | 100705         |
| PE/Cy7 anti-mouse CD8a Antibody                   | 53-6.7      | Biolegend  | 100722         |
| FITC anti-mouse CD45 Antibody                     | 30-F11      | Biolegend  | 103107         |
| APC anti-mouse CD317 (BST2, PDCA-1) Antibody      | 927         | Biolegend  | 127016         |
| FITC anti-mouse CD86 Antibody                     | GL1         | Biolegend  | 105005         |
| Brilliant Violet 421 anti-Mouse CD11b Antibody    | M1/70       | Biolegend  | 101235         |
| FITC anti-Mouse Ly6C Antibody                     | HK1.4       | Biolegend  | 128005         |
| APC-Cy7 Anti-Mouse Ly6G Antibody                  | 1A8         | Biolegend  | 127623         |
| PE anti-Mouse CD103 Antibody                      | 2E7         | eBiolegend | 121405         |

| <b>Antibodies for flow cytometry</b> |         |               |                |
|--------------------------------------|---------|---------------|----------------|
| Name                                 | Clone   | Vender        | Catalog number |
| PE Anti-Mouse CD11c Antibody         | HL3     | BD pharmingen | 557401         |
| FITC Anti-Mouse CD80 Antibody        | 16-10A1 | BD pharmingen | 561954         |
| FITC Anti-Mouse CD40 Antibody        | 3/23    | BD pharmingen | 553790         |
| PE Anti-Mouse NK1.1 Antibody         | PK136   | eBioscience   | 12-5941-82     |
| FITC Anti-Mouse CD4 Antibody         | GK1.5   | eBioscience   | 11-0041-82     |

| <b>Antibodies for western blotting and immunoprecipitation</b> |       |                           |                |
|----------------------------------------------------------------|-------|---------------------------|----------------|
| Name                                                           | clone | Vender                    | Catalog number |
| Myosin Light Chain 2 Antibody                                  |       | Cell Signaling Technology | #3672          |
| Phospho-Myosin Light Chain 2 (Ser19) Antibody                  |       | Cell Signaling Technology | #3671          |
| p70 S6 Kinase Rabbit mAb                                       | 49D7  | Cell Signaling Technology | #2708          |
| Phospho-p70 S6 Kinase (Thr389) Rabbit mAb                      | 108D2 | Cell Signaling Technology | #9234          |
| $\beta$ -Actin Rabbit mAb (HRP Conjugate)                      | 13E5  | Cell Signaling Technology | #5125          |
| MYPT1 Antibody                                                 |       | Cell Signaling Technology | #2634          |
| Phospho-MYPT1 (Thr696) Antibody                                |       | Cell Signaling Technology | #5163          |
| M-RIP Rabbit mAb                                               | D8G8R | Cell Signaling Technology | #14396         |
| LAMTOR1/C11orf59 XP® Rabbit mAb                                | D11H6 | Cell Signaling Technology | #8975          |
| LAMTOR2/ROBLD3 Rabbit mAb                                      | D7C10 | Cell Signaling Technology | #8145          |
| LAMTOR3/MAPKSP1 Rabbit mAb                                     | D38G5 | Cell Signaling Technology | #8168          |
| LAMTOR4/C7orf59 Rabbit mAb                                     | D6A4V | Cell Signaling Technology | #12284         |
| LAMTOR5/HBXIP Rabbit mAb                                       | D4V4S | Cell Signaling Technology | #14633         |
| GFP Antibody                                                   |       | Cell Signaling Technology | #2555          |
| ANTI-FLAG® M2-Peroxidase (HRP) mAb                             |       | Sigma                     | A8592          |
| V5 Tag Monoclonal Antibody, HRP                                |       | Invitrogen                | R96125         |
| HA-tag monoclonal antibody, HRP                                | Y-11  | Santa Cruz                | Sc-805         |
| Purified anti-CRISPR (CAS9) Antibody                           | 7A9   | BioLegend                 | 844301         |
| DYKDDDDK Tag Antibody                                          |       | Cell Signaling Technology | 2368           |
| V5 Tag Monoclonal Antibody                                     |       | Invitrogen                | R960-25        |
| Anti-MPRIP antibody                                            |       | Sigma                     | HPA022901      |

| <b>Primers for generation of vectors and KO-cell-line</b>               |                                                                                         |
|-------------------------------------------------------------------------|-----------------------------------------------------------------------------------------|
| Generation of Lamtor1-KO-THP1                                           | 5'-TGCGAGCGGAAGGCAGGCTG-3'                                                              |
|                                                                         | 5'-GCTCCGGGACAGGGGTACG-3'                                                               |
|                                                                         | 5'-TCCGGTCACATGACCCGCGG-3'                                                              |
|                                                                         | 5'-CTGCTACAGCAGCGAGAACG-3'                                                              |
|                                                                         | 5'-GGCCTGCTCATCAGTGCGAG-3'                                                              |
|                                                                         | 5'-AGGTGCTCACCTGTACTGCC-3'                                                              |
| p18_Kozak_Fw (Attaches NotI site)                                       | 5'-AATTCTGCAGCGCCGCGCCACCATGGGGTGCTGC-3'                                                |
| p18_FLAG_Rv                                                             | 5'-GGAGAGGGGCGGATCCTCACTACTTGTGCATCGTCAT-3'                                             |
| p18_trunc1_Rv                                                           | 5'-CCGTCATGGTCTTTGTAGTCAGAAAGTCACTATAGGCAT-3'                                           |
| p18_trunc3_Rv                                                           | 5'-CCGTCATGGTCTTTGTAGTCCTGGCTGGTGAGAGATGGCA-3'                                          |
| p18_trunc5_Rv                                                           | 5'-CCGTCATGGTCTTTGTAGTCATGGTAGTTGGGCTCGGCTC-3'                                          |
| p18_mutant_Rv                                                           | 5'-ATCACCGTGCATGGTCTTTGTAGTCTGGGATCCCAAAGTACAACCAG-3'                                   |
| 3xFLAG_oligo_Rv                                                         | 5'-<br>TCACTACTTGTGCATCGTCATCCTTGTAGTCGATGTCATGATCTTTATAATCACCG<br>TCATGGTCTTTGTAGTC-3' |
| p18_FLAG_Rv (Attaches BamHI site, same as mLAMTOR1_3XFLAG intoVenus_Rv) | 5'-GGAGAGGGGCGGATCCTCACTACTTGTGCATCGTCAT-3'                                             |

|                            |                | PCR1: Cloning Lamtor1 |               | PCR2: Ligation of 3xFlag |                 |             |
|----------------------------|----------------|-----------------------|---------------|--------------------------|-----------------|-------------|
| Label in Note              | Label in Paper | Fw                    | Rv            | Fw                       | Rv1             | Rv2         |
| Full (for attaching Kozak) | Full           | p18_Kozak_Fw          | p18_FLAG_Rv   | p18_Kozak_Fw             | 3xFLAG_oligo_Rv | p18_FLAG_Rv |
| Trunc 1                    | ΔT1            | p18_Kozak_Fw          | p18_trunc1_Rv | p18_Kozak_Fw             | 3xFLAG_oligo_Rv | p18_FLAG_Rv |
| Trunc 3                    | ΔT2            | p18_Kozak_Fw          | p18_trunc3_Rv | p18_Kozak_Fw             | 3xFLAG_oligo_Rv | p18_FLAG_Rv |
| Trunc 5                    | ΔT3            | p18_Kozak_Fw          | p18_trunc5_Rv | p18_Kozak_Fw             | 3xFLAG_oligo_Rv | p18_FLAG_Rv |
| a4E                        | α4E            | p18_Kozak_Fw          | p18_mutant_Rv | p18_Kozak_Fw             | 3xFLAG_oligo_Rv | p18_FLAG_Rv |

### Primers for mice screening

|                                              |                                   |
|----------------------------------------------|-----------------------------------|
| Lamtor1 <sup>fllox</sup> and Lamtor1 alleles | 5'-AAGGATTCGGAGTTAGAGACTAGGAC-3'  |
|                                              | 5'-TGAGGATTCGAGTGGTGAGATACGA-3'   |
| CD11c-Cre-Tg mice                            | 5'-AGACTCAGCTCAAGTGCTAC-3'        |
|                                              | 5'-GCGAACATCTTCAGGTTCTG-3'        |
| LysM-Cre-Tg mice                             | 5'-CTTGCTGTGTGTTGTTCTGTGCTGAGG-3' |
|                                              | 5'-GCATAACCAGTGAAACAGCATTGC-3'    |

### Supplementary Table 2. Reagents, antibodies, and primers

Reagents, antibodies, and primers used in this study are listed.
